# Supplementary material
Source: PubMed Central journal article supplement (PMC3490513)

**A**

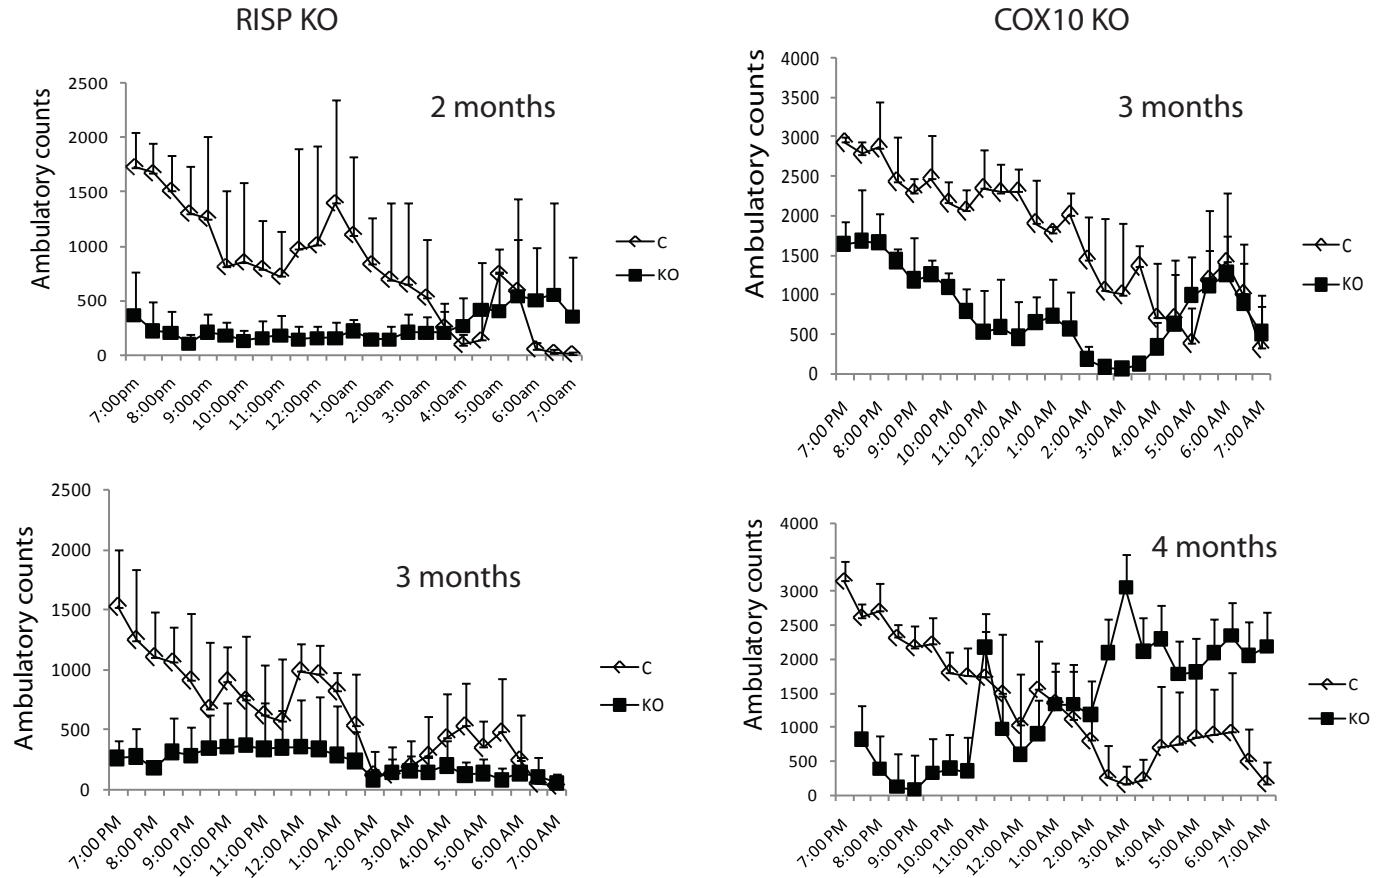

**B**

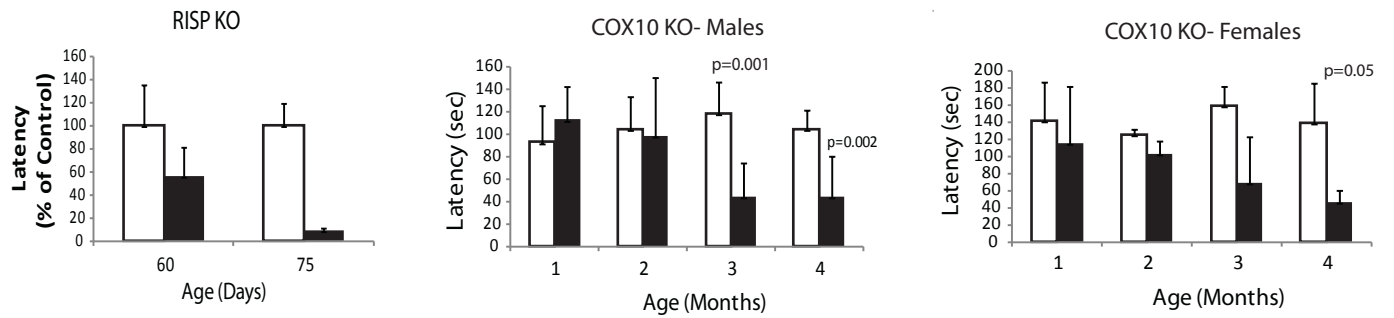

Supplement: supp_dds350_dds350supp_fig1.pdf [file supp_dds350_dds350supp_fig1.pdf]

A

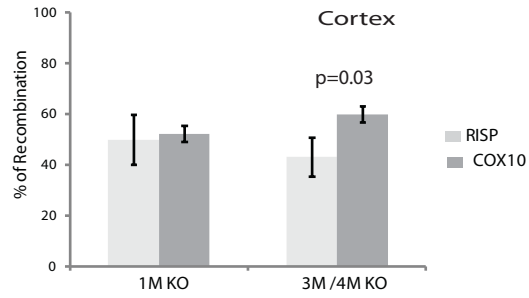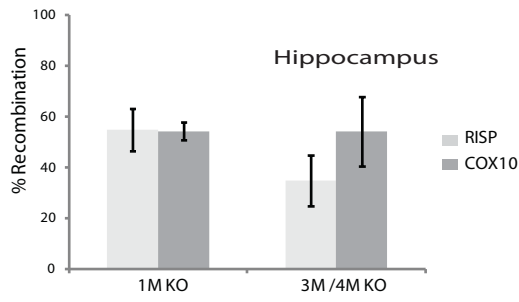

B

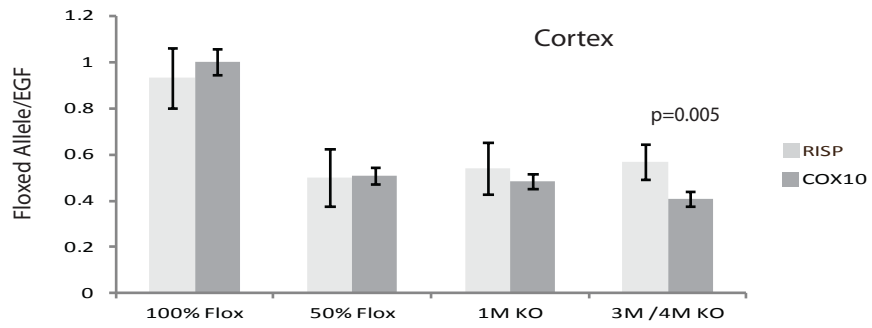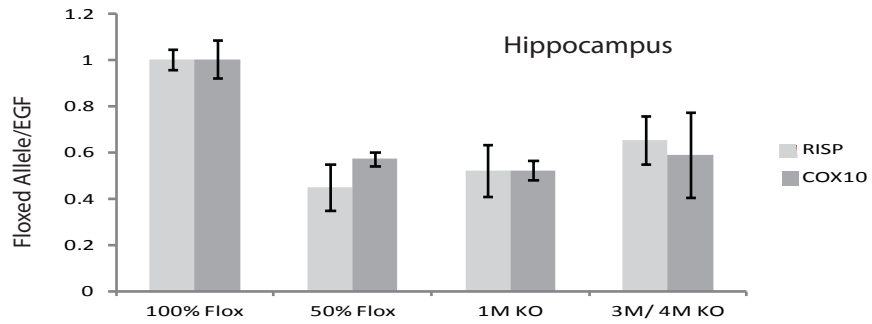

Supplement: supp_dds350_dds350supp_fig2.pdf [file supp_dds350_dds350supp_fig2.pdf]

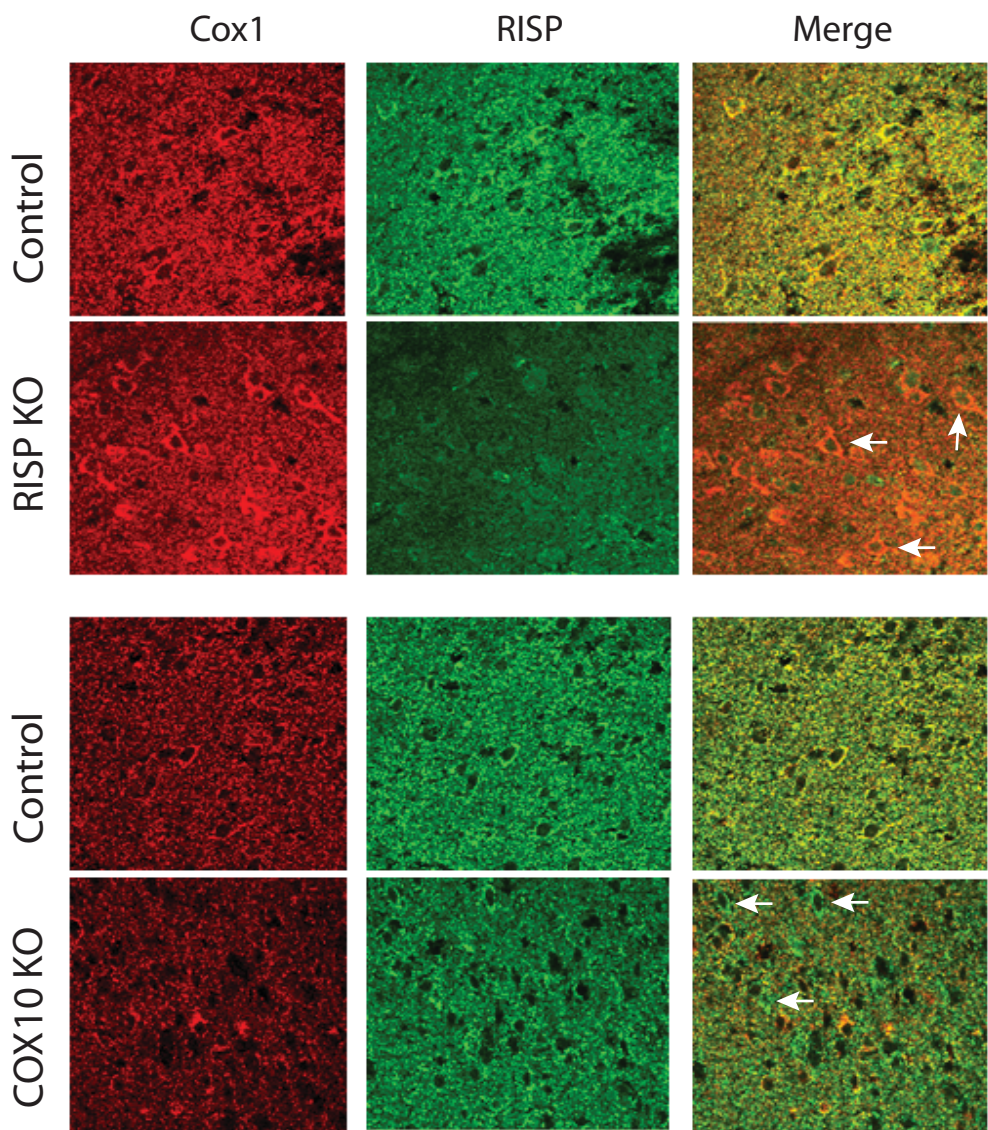

Supplement: supp_dds350_dds350supp_fig3.pdf [file supp_dds350_dds350supp_fig3.pdf]

A

Hippocampus

RISP KO

COX10 KO

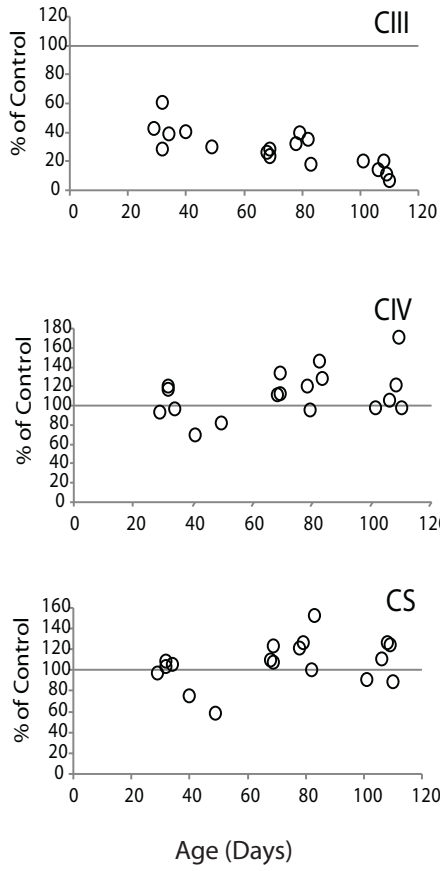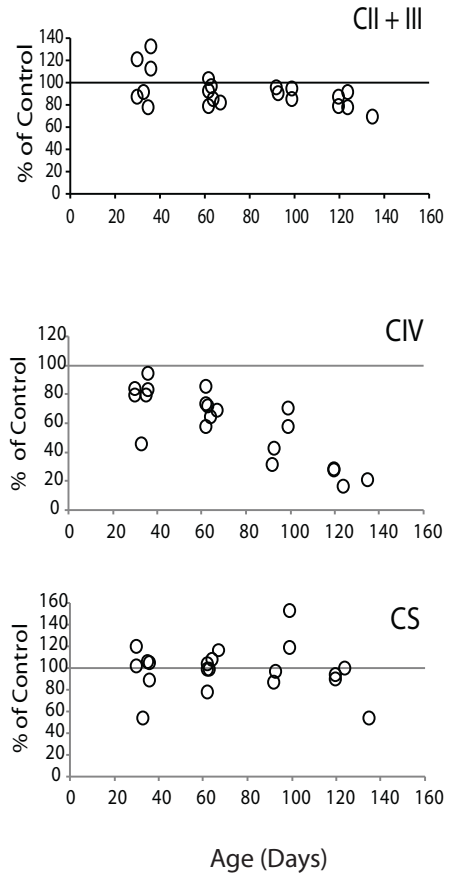

B

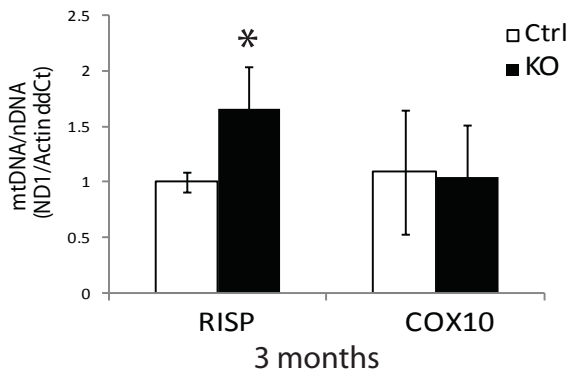

Supplement: supp_dds350_dds350supp_fig5.pdf [file supp_dds350_dds350supp_fig5.pdf]

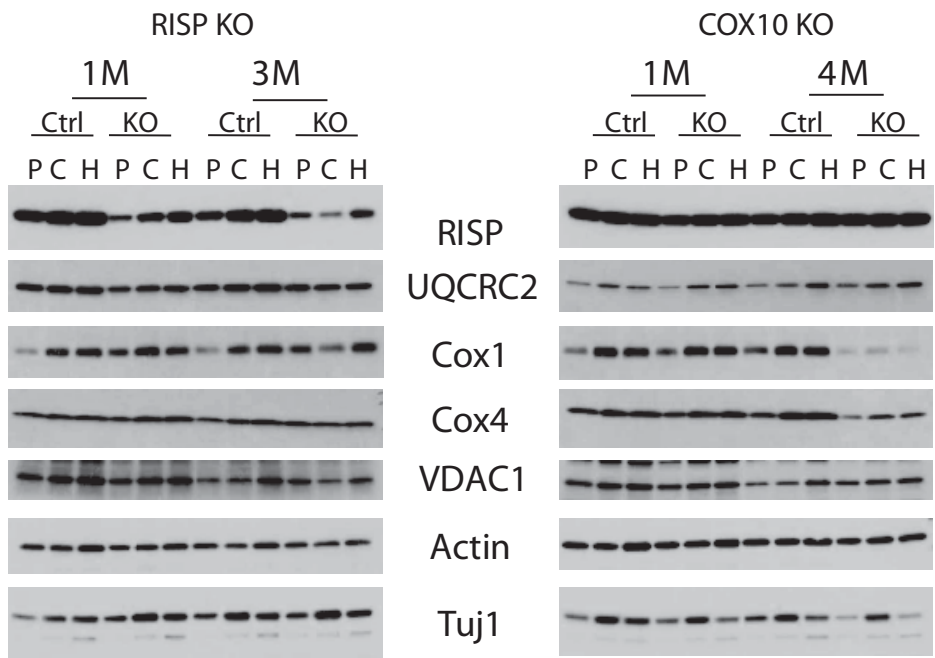

P=Piriform Cortex; C= Cingulate Cortex; H= Hippocampus

Supplement: supp_dds350_dds350supp_fig6.pdf [file supp_dds350_dds350supp_fig6.pdf]
